# Supplementary material
Source: PubMed Central journal article supplement (PMC8068667)
Supplement: NIHMS1675956-supplement-1.pdf [file NIHMS1675956-supplement-1.pdf]

## Supplementary Figure 1

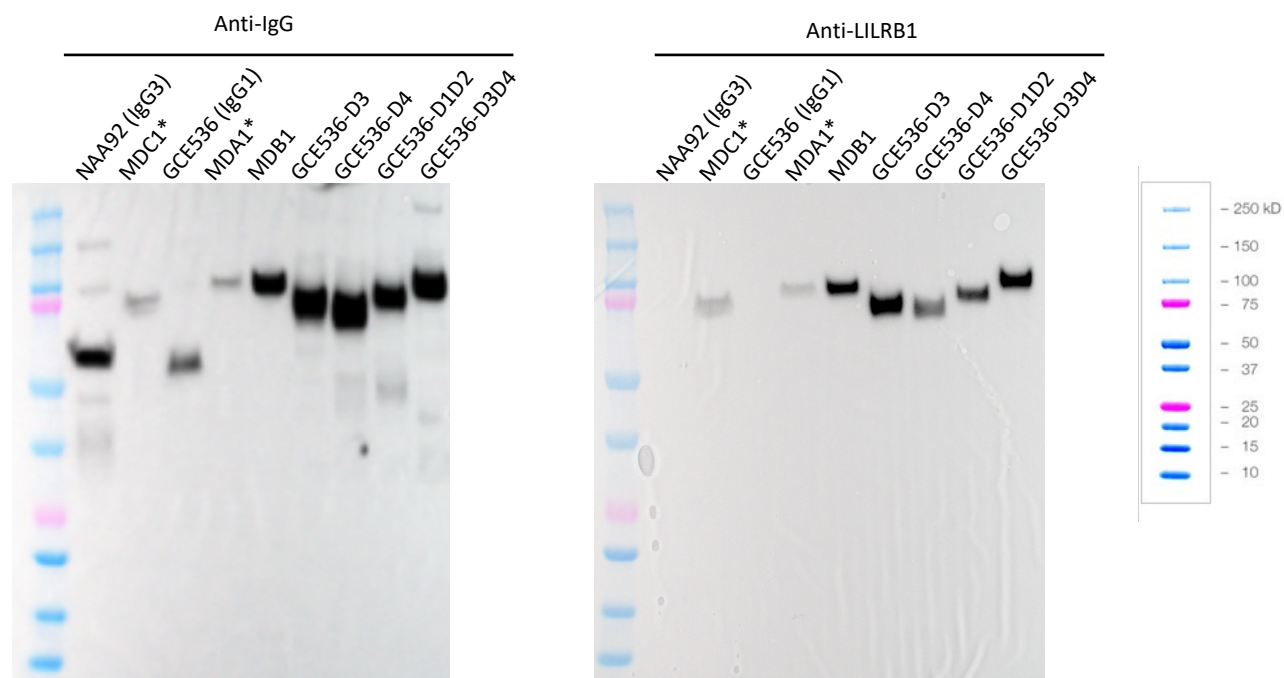

**Supplementary Figure 1. Original source images for western blot analysis of naturally occurring LILRB1-containing antibodies.** MDC1 and MDA1 tested as culture supernatants and MDB1 tested as recombinant antibody. Shown are also IgG1 and IgG3 isotype control antibodies (GCE536 and NAA92), as well as recombinant antibodies carrying different LILRB1 domains inserted in the GCE536 VH-CH1 elbow (representative of  $n = 2$  independent experiments).

**Supplementary Table 1 | V gene and insert usage of representative LILRB1-containing antibodies**

| Donor | mAb  | Isotype | Heavy chain VDJ genes (% identity to GL) |        |        |       |     | Light chain VDJ genes (% identity to GL) |        |        |     |        | Inserted LILRB1 domain | LILRB1 mutations (% identity to GL) |
|-------|------|---------|------------------------------------------|--------|--------|-------|-----|------------------------------------------|--------|--------|-----|--------|------------------------|-------------------------------------|
| A     | MDA1 | IgG1    | λ                                        | VH3-74 | (92.4) | D2-21 | JH4 | (87.5)                                   | VL1-51 | (95.4) | JL2 | (86.1) | D3-D4                  | (100)                               |
| B     | MDB1 | IgG4    | λ                                        | VH2-5  | (90.7) | D5-24 | JH4 | (87.5)                                   | VL3-25 | (89.6) | JL1 | (86.8) | D3-D4                  | (100)                               |
| C     | MDC1 | IgG3    | κ                                        | VH7-4  | (94.8) | D4-23 | JH3 | (94)                                     | VK4-1  | (91.9) | JK2 | (91.9) | D3                     | (99)                                |
| C     | MDC2 | IgG3    | κ                                        | VH7-4  | (94.8) | D4-23 | JH3 | (94)                                     | VK3-20 | (95.8) | JK1 | (94.7) | D3                     | (99)                                |

Isotype and *V(D)J* gene usage of heavy chain and light chain of mAbs containing LILRB1 domain/domains in the switch region. GL, germline.

Supplementary Table 2 | Data Collection and Refinement Statistics for cryoEM and X-ray crystallography

a

|                                                 | MDB1: RIFIN-V2<br>EMD-22879<br>PDB-7KHF |
|-------------------------------------------------|-----------------------------------------|
| <b>Data Collection</b>                          |                                         |
| Microscope                                      | FEI Titan Krios                         |
| Voltage (kV)                                    | 300                                     |
| Electron dose (e <sup>-</sup> /Å <sup>2</sup> ) | 70.72                                   |
| Detector                                        | Gatan K2 Summit                         |
| Pixel Size (Å)                                  | 1.083                                   |
| Defocus Range (µm)                              | -0.1 to -3.0                            |
| Magnification                                   | 81000                                   |
| Reconstruction                                  |                                         |
| Software                                        | cryoSparc                               |
| Particles                                       | 390908                                  |
| Symmetry                                        | C1                                      |
| Box size (pix)                                  | 320                                     |
| Resolution (Å) (FSC0.143) <sup>§</sup>          | 3.5                                     |
| <b>Refinement (Phenix)<sup>#</sup></b>          |                                         |
| Protein residues                                | 3855                                    |
| Chimera CC                                      | 0.85                                    |
| Resolution (FSC <sub>0.5</sub> )                | 3.9                                     |
| EMRinger Score                                  | 2.85                                    |
| R.m.s. deviations                               |                                         |
| Bond lengths (Å)                                | 0.008                                   |
| Bond angles (°)                                 | 1.02                                    |
| Validation                                      |                                         |
| Molprobtity score                               | 1.79                                    |
| Clash score                                     | 7.03                                    |
| Favored rotamers (%)                            | 93.6                                    |
| Ramachandran                                    |                                         |
| Favored regions (%)                             | 94.08                                   |
| Disallowed regions (%)                          | 0                                       |

b

|                                            | LILRB1-D3D4:RIFIN.V2<br>(PF3D7_1373400)<br>7KFK |
|--------------------------------------------|-------------------------------------------------|
| <b>Data collection</b>                     |                                                 |
| Wavelength                                 | 1                                               |
| Resolution range (Å)                       | 50 - 2.65 (2.70 - 2.65)                         |
| Space group                                | P 4 <sub>2</sub> 2 <sub>1</sub> 2               |
| Cell dimensions                            |                                                 |
| <i>a</i> , <i>b</i> , <i>c</i> (Å)         | 111.0 111.0 152.1                               |
| $\alpha$ , $\beta$ , $\gamma$ (°)          | 90, 90, 90                                      |
| Unique reflections                         | 28673 (1410)                                    |
| Multiplicity                               | 21.2 (16.9)                                     |
| Completeness (%)                           | 99.8 (99.9)                                     |
| I / $\sigma$ I                             | 29.9 (2.1)                                      |
| Wilson <i>B</i> -factor                    | 62.29                                           |
| <i>R</i> <sub>merge</sub>                  | 0.200 (1.306)                                   |
| CC1/2                                      | 0.998 (0.896)                                   |
| <b>Refinement</b>                          |                                                 |
| Reflections used in refinement             | 28615 (2663)                                    |
| Reflections used for R-free                | 1415 (125)                                      |
| <i>R</i> <sub>work</sub>                   | 0.23 (0.38)                                     |
| <i>R</i> <sub>free</sub>                   | 0.27 (0.44)                                     |
| Number of non-hydrogen atoms               |                                                 |
| macromolecules                             | 5009                                            |
| ligands                                    | 119                                             |
| solvent                                    | 54                                              |
| Protein residues                           | 679                                             |
| RMS(bonds) (Å)                             | 0.005                                           |
| RMS(angles) (°)                            | 0.88                                            |
| Ramachandran favored (%)                   | 97.74                                           |
| Ramachandran outliers (%)                  | 0.00                                            |
| Average <i>B</i> -factor (Å <sup>2</sup> ) |                                                 |
| macromolecules                             | 64.67                                           |
| ligands                                    | 63.83                                           |
| solvent                                    | 103.85                                          |
|                                            | 55.61                                           |

\*Values in parentheses are for highest-resolution shell.

§ Resolutions are reported according to the FSC 0.143 gold-standard criterion.

& The numbers in parenthesis are resolution values calculated using cryoSparc

# Statistics are reported for the protein residues within the complex excluding the Ab constant domains.

**Supplementary Table 3 | Primers for detection of LILRB1 inserts**

| Name     | Content                                                      | Primer 5' to 3'              |
|----------|--------------------------------------------------------------|------------------------------|
| MOC19    | 5' primer for MGAA2 V region                                 | CAGGTGCAGCTGGTCAATCTGGG      |
| MOC20    | 5' primer for MGAA2 V region, internal to MOC19              | CCTTCAGTGCCATATGCTATAAATTGG  |
| MOC21    | 5' primer for MGAA2 V region, internal to MOC20              | GTGCAAGGGATCCTATTAGACCTCG    |
| MOC22    | 5' primer for MGAB11 V region                                | GAGGTCCAGCTGGTGGAGTCC        |
| MOC23    | 5' primer for MGAB11 V region, internal to MOC22             | CCTGTGTAGTCTCTGGATTACCC      |
| MOC24    | 5' primer for MGAB11 V region, internal to MOC23             | GACGCTGGTCACGGACTCCTTA       |
| MOA120   | 5' primer for LILRB1 exon 7                                  | CTAAGAAGCCATCACTCTCAGTGCAGC  |
| MOA120.5 | 3' primer for LILRB1 exon 7                                  | GCTGCACTGAGAGTGATGGCTTCTTAG  |
| MOA121   | 5' primer for LILRB1 exon 7                                  | CTACGGTGCACACAACCTCTCCCGAG   |
| MOA121.5 | 3' primer for LILRB1 exon 7                                  | CTCGGAGGAGAGGTTGTGTGCACCGTAG |
| MOA122   | 5' primer for LILRB1 7-8 intron                              | GTTCAGTCAGGGACCCAGGCTCCGCAC  |
| MOA122.5 | 3' primer for LILRB1 7-8 intron                              | GTGGGGAGCTGGTCCCTGACTGAAC    |
| MOA123   | 5' primer for LILRB1 7-8 intron                              | GGGGAGGTGTGAGCTCAGAGCAAGGTG  |
| MOA123.5 | 3' primer for LILRB1 7-8 intron                              | CACCTTGCTCTGAGCTGACACCTCCCC  |
| MOA124   | 5' primer for LILRB1 exon 8                                  | GACAGTTCATGACAGAGTCTCCCTCT   |
| MOA124.5 | 3' primer for LILRB1 exon 8                                  | AGAGGGAGACTCTGTATAGAACTGTC   |
| MOA125   | 5' primer for LILRB1 exon 8                                  | GAATTCCTCCATGGGTCTGTGACCTCAG |
| MOA125.5 | 3' primer for LILRB1 exon 8                                  | CTGAGGTCACAGGACCCATGGGGAATTC |
| MOA126   | 5' primer for VH2-5 Leader Exon 1                            | ATGGACACACTTTGCTCCACGCTCCTG  |
| MOA127   | 5' primer for VH2-5 Leader Exon + Intron, internal to MOA126 | CATGTGAGTGCTGTGGTCAGGGACTCC  |
| MOA128   | 5' primer for MGZ4 VH2-5 difference, internal to MOA127      | CTGGTCTACGCTGGTGGAAACGCACAC  |
| MOA31    | 3' primer for IgG, Cg, -288bp                                | TCTTGTCCACCTTGGTGTGCT        |
| MOA32    | 3' primer for IgG, Cg, -95bp, internal to MOA45, MOA31       | GTAGTCCTTGACCAGGCAGC         |
